# Supplementary material for: Evaluation of acidogenesis products’ effect on biogas production performed with metagenomics and isotopic approaches
Source: PubMed Central journal article supplement (PMC8164749; doi:10.1186/s13068-021-01968-0), 2021-05-29
Supplement: 13068_2021_1968_MOESM2_ESM.pdf [file 13068_2021_1968_MOESM2_ESM.pdf]

## Additional file 2

Table 1. Median of the COD utilization and methane production during Experiments 1 and 2.

| Experiments  | COD reduction [%] |      |      |      | Methane Production [dm <sup>3</sup> /g COD reduced] |      |      |      |
|--------------|-------------------|------|------|------|-----------------------------------------------------|------|------|------|
|              | M1                | M2   | M3   | M4   | M1                                                  | M2   | M3   | M4   |
| Experiment 1 | 75.5              | 68.1 | 69.3 | 74.5 | 0.44                                                | 0.59 | 0.43 | 0.45 |
| Experiment 2 | 80.3              | 62.9 | 69.1 | 82.1 | 0.50                                                | 0.45 | 0.43 | 0.37 |

Table 2. The level of statistical significance for differences in median (MWt) and distributions (KSt) between the bioreactors performance over time during Experiments 1 and 2.

| test         | COD reduction [%] |              |            |              |              |              | Methane Production [dm <sup>3</sup> /g COD reduced] |            |              |              |              |            |
|--------------|-------------------|--------------|------------|--------------|--------------|--------------|-----------------------------------------------------|------------|--------------|--------------|--------------|------------|
|              | M1/M2<br>p        | M1/M3<br>p   | M1/M4<br>p | M2/M3<br>p   | M2/M4<br>p   | M3/M4<br>p   | M1/M2<br>p                                          | M1/M3<br>p | M1/M4<br>p   | M2/M3<br>p   | M2/M4<br>p   | M3/M4<br>p |
| Experiment 1 |                   |              |            |              |              |              |                                                     |            |              |              |              |            |
| MWt          | 0.119             | 0.167        | 0.799      | 0.221        | <b>0.005</b> | <b>0.013</b> | <b>0.026</b>                                        | 0.699      | 0.589        | <b>0.015</b> | <b>0.002</b> | 0.310      |
| KSt          | 0.139             | 0.139        | 0.893      | 0.441        | <b>0.005</b> | <b>0.031</b> | <b>0.031</b>                                        | 0.893      | 0.893        | <b>0.031</b> | <b>0.005</b> | 0.441      |
| Experiment 2 |                   |              |            |              |              |              |                                                     |            |              |              |              |            |
| MWt          | <b>0.000</b>      | <b>0.000</b> | 0.570      | <b>0.025</b> | <b>0.000</b> | <b>0.001</b> | 0.157                                               | 0.057      | <b>0.009</b> | 0.448        | 0.064        | 0.336      |
| KSt          | <b>0.000</b>      | <b>0.000</b> | 1.00       | <b>0.015</b> | <b>0.001</b> | <b>0.001</b> | 0.291                                               | 0.125      | <b>0.015</b> | 0.570        | <b>0.046</b> | 0.125      |

MWt – Mann-Whitney test, KSt – Kolmogorov-Smirnov test, p – level of statistical significance, bolded in read – statistically significant at  $\leq 0.05$
